# Supplementary material
Source: publisher figshare collection journal article supplement (https://brill.figshare.com/ndownloader/files/36476484)
Supplement: Supplementary file 1 [file 36476484]

## Sheet: Supplementary Table S1
Gene region	Primer name	Direction	Primer sequence	References
COI	TY-J-1460-Spilo	F	TACAATTTATCGCTTAATACTCAGCC	Matsui et al. (2021)
COI	TL2-N-3014-Spilo	R	TCCATTACATATAATCTGCCATATTA	Matsui et al. (2021)
COI	C1-J-1718	F	GGAGGATTTGGAAATTGATTAGTTCC	Simon et al. (1994)
COI	LCO1490	F	GGTCAACAAATCATAAAGATATTGG	Folmer et al. (1994)
COI	HCO2198	R	TAAACTTCAGGGTGACCAAAAAATCA	Folmer et al. (1994)
CAD (part1)	CAD_496F	F	CARACNGCNYTNAAYTGYGG	Regier et al. (2008)
CAD (part1)	CAD_782R	R	GCYTTYTGRAANGCYTCYTCRAA	Regier et al. (2008)
CAD (part2)	CAD4-Pyr-F	F	GAAGAAGCATTTCAAAAAGC	Haines & Rubinoff (2012)
CAD (part2)	CAD4-Pyr-R	R	CKRTCACTCATGTCRTA	Haines & Rubinoff (2012)
CAD (part2)	CAD_1028R	R	TTRTTNGGNARYTGNCCNCCCAT	Regier et al. (2008)
EF1α	Oscar	F	GGCCCAAGGAAATGGGCAAGGG	Haines & Rubinoff (2012)
EF1α	Bosie	R	CCGGCGACGTAACCACGACGC	Haines & Rubinoff (2012)
EF1α	EF51.9	F	CARGACGTATACAAAATCGG	Wahlberg & Wheat (2008)
EF1α	EFrcM4	R	ACAGCVACKGTYTGYCTCATRTC	Wahlberg & Wheat (2009)
RpS5	RpS5f	F	ATGGCNGARGARAAYTGGAAYGA	Wahlberg & Wheat (2010)
RpS5	RpS5r	R	CGGTTRGAYTTRGCAACACG	Wahlberg & Wheat (2011)
RpS5	RpS5_01F	F	CAAACTGTTYGGRAGRTGGA	This study
RpS5	RpS5-01R	R	GADCCCTTRGCAGCRTTRAT	This study
